# Supplementary material for: Tailoring nanobranches in three-dimensional hierarchical rutile heterostructures: a case study of TiO2–SnO2
Source: Royal Society of Chemistry journal article supplement (doi:10.1039/c3ce26722a), 2013-01-01
Supplement: c3ce26722a.pdf [file c3ce26722a.pdf]

Supporting Information for:

## **Tailoring nanobranches in three-dimensional hierarchical rutile heterostructures: A case study of TiO<sub>2</sub>-SnO<sub>2</sub>**

Sangbaek Park,<sup>†</sup> Sangwook Lee,<sup>‡</sup> Se Won Seo,<sup>†</sup> Seung-Deok Seo,<sup>§</sup> Chan Woo Lee,<sup>†</sup> Donghoe Kim,<sup>†</sup> Dong-Wan Kim,<sup>§,\*</sup> and Kug Sun Hong<sup>†,\*</sup>

<sup>†</sup> Department of Materials Science and Engineering, Seoul National University, Seoul 151-744, Korea

<sup>‡</sup> Department of Material Science and Engineering, University of California at Berkeley, CA94709, USA

<sup>§</sup> Department of Materials Science and Engineering, Ajou University, San 5, Woncheon-dong, Yeongtong-gu, Suwon 443-749, Korea

\*To whom correspondence should be addressed. E-mail: dwkim@ajou.ac.kr and kshongss@plaza.snu.ac.kr

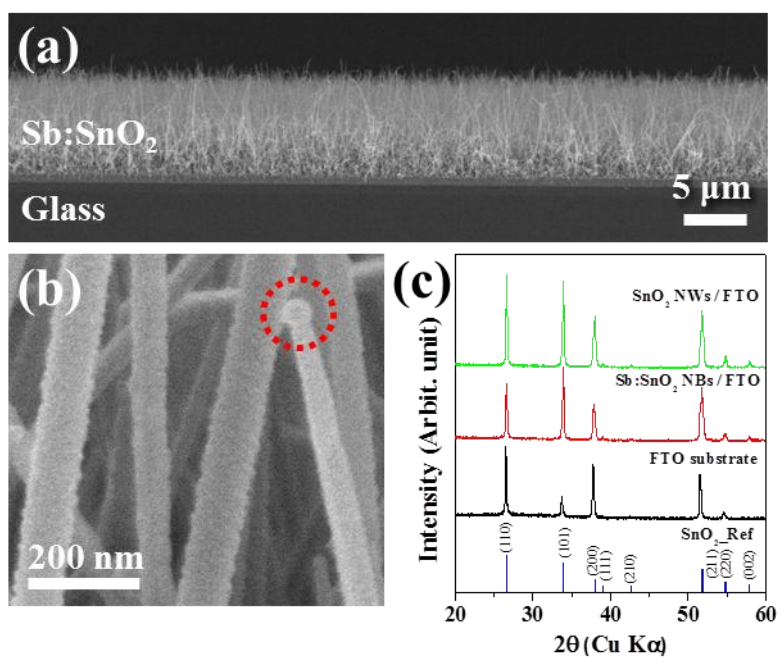

**Fig. S1.** (a) low and (b) high magnification of cross-sectional SEM images of the SnO<sub>2</sub> NBs, and (c) XRD graphs of the FTO substrate, Sb:SnO<sub>2</sub> NBs, and undoped-SnO<sub>2</sub> NWs.

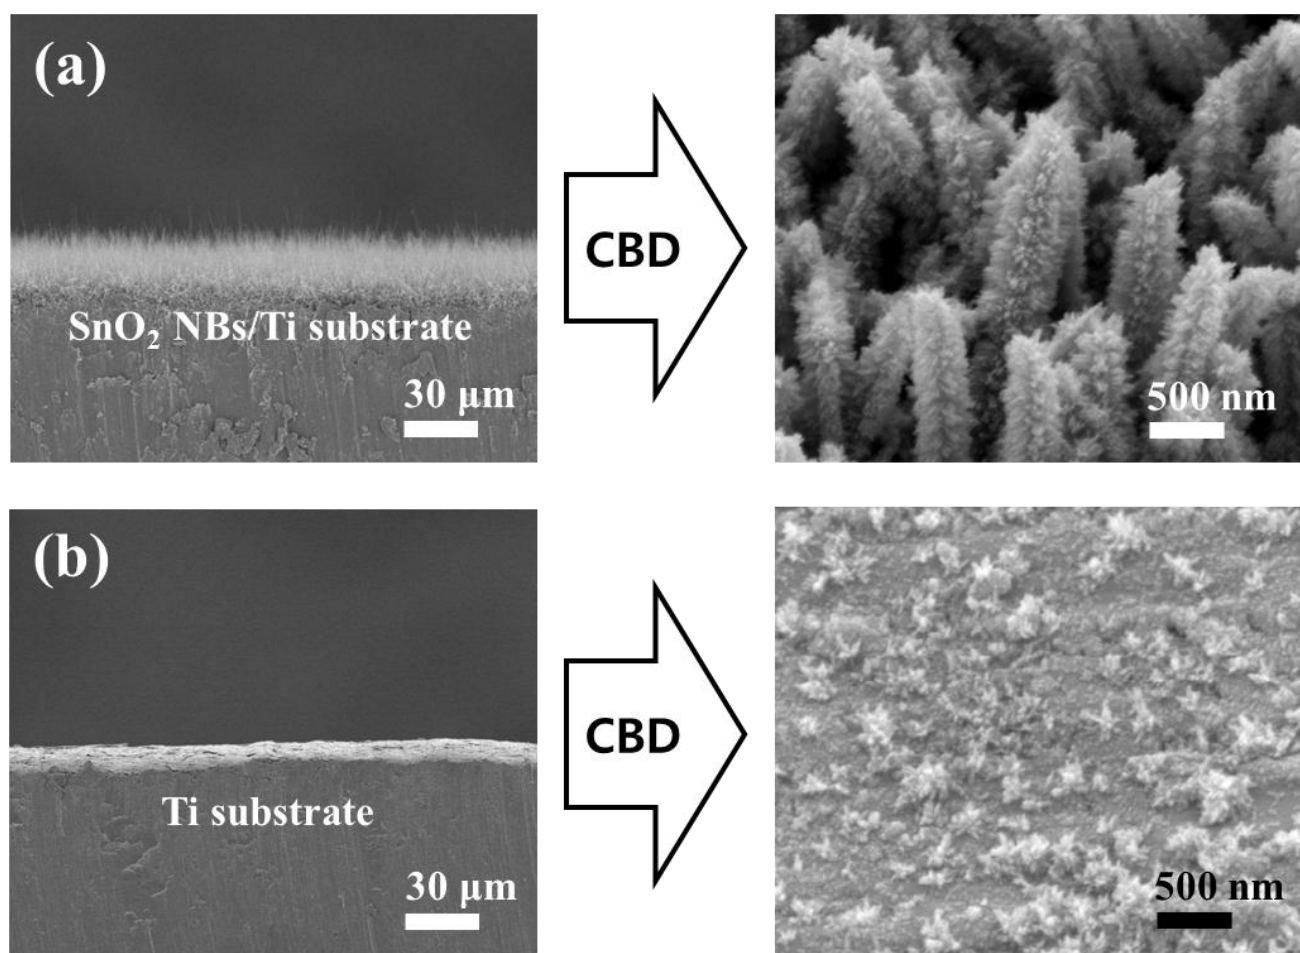

**Fig. S2.** SEM images of TiO<sub>2</sub> NRs in CBD (a) with and (b) without the SnO<sub>2</sub> NBs substrates.

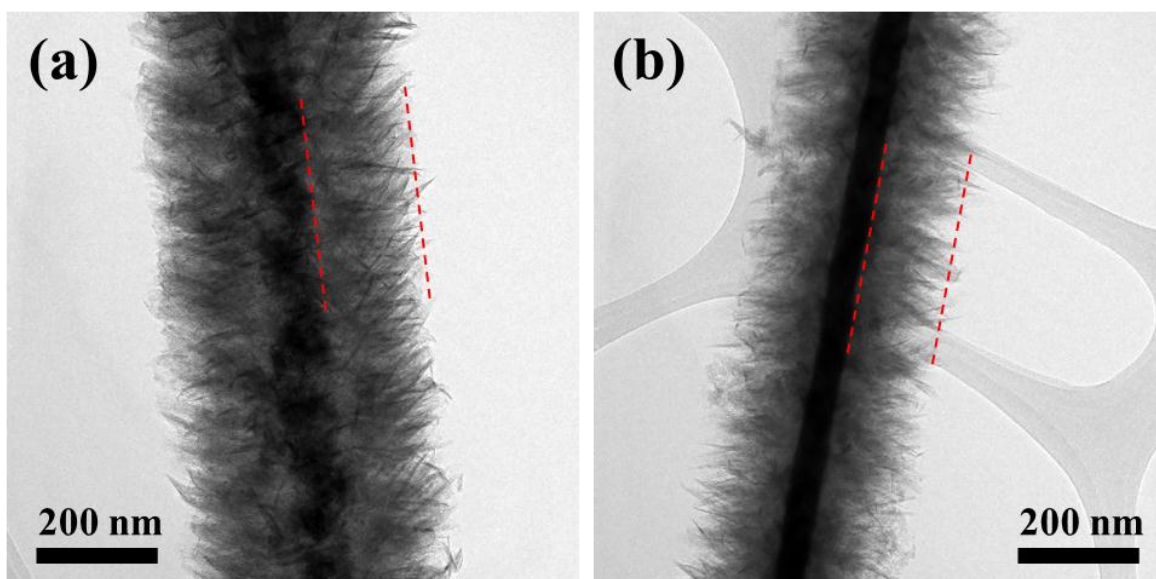

**Fig. S3.** TEM images of TiO<sub>2</sub> nanobranched structures synthesized by CBD with the addition of (a) HNO<sub>3</sub> and (b) HCl

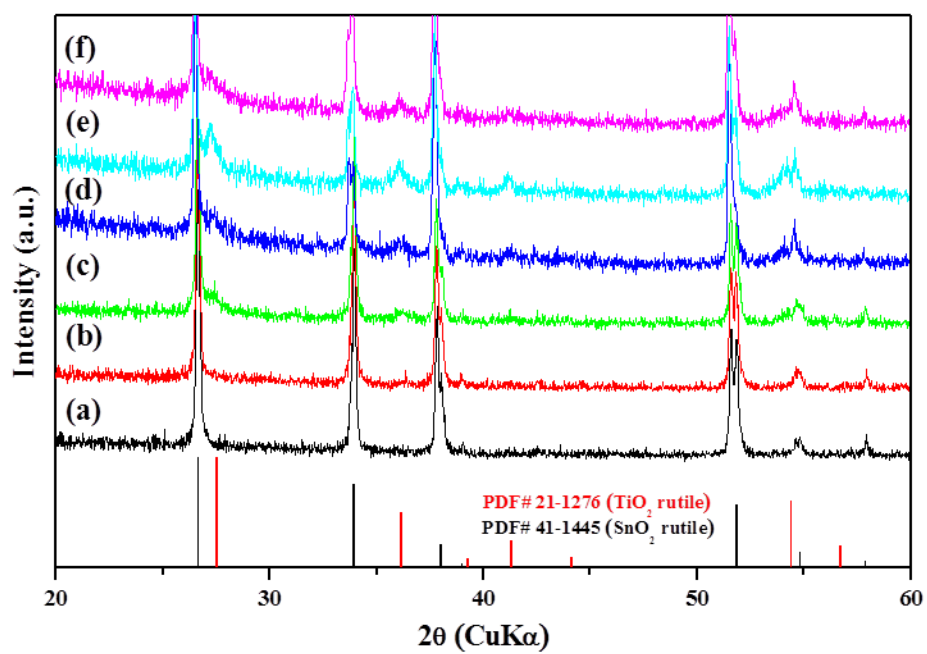

**Fig. S4.** XRD graphs of nanobranches synthesized in the presence of HNO<sub>3</sub> at different concentrations: (a) 0.02 M, (b) 0.06 M, (c) 0.1 M, (d) 0.2 M, (e) 0.3 M, and (f) 0.6 M.

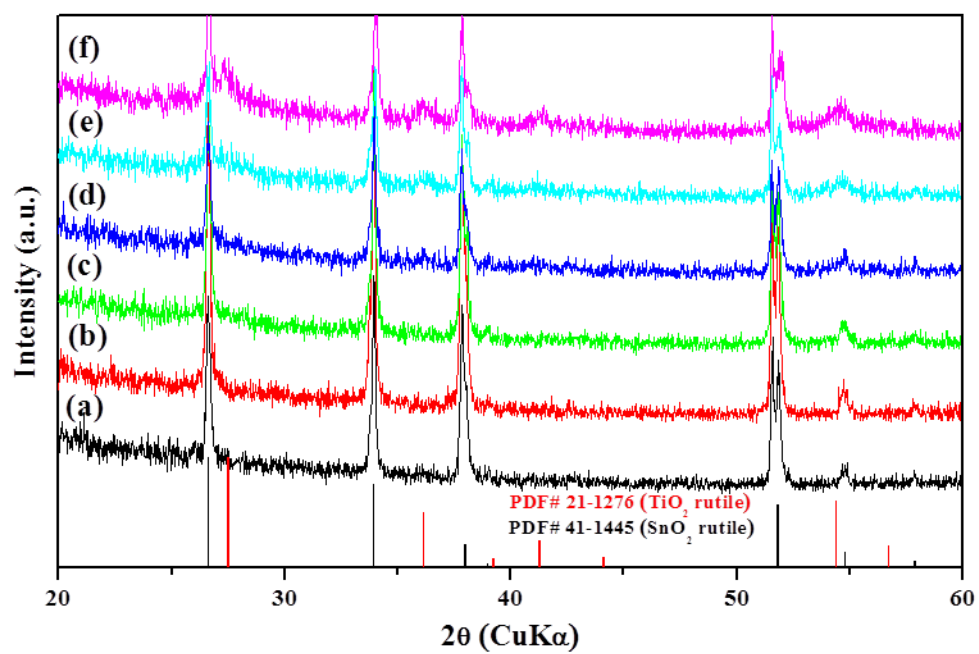

**Fig. S5.** XRD graphs of nanobranches synthesized in the presence of 0.2 M  $\text{HNO}_3$  along the reaction time: (a) 0.5 h, (b) 1 h, (c) 1.5 h, (d) 2 h, (e) 2.5 h, and (f) 3 h.

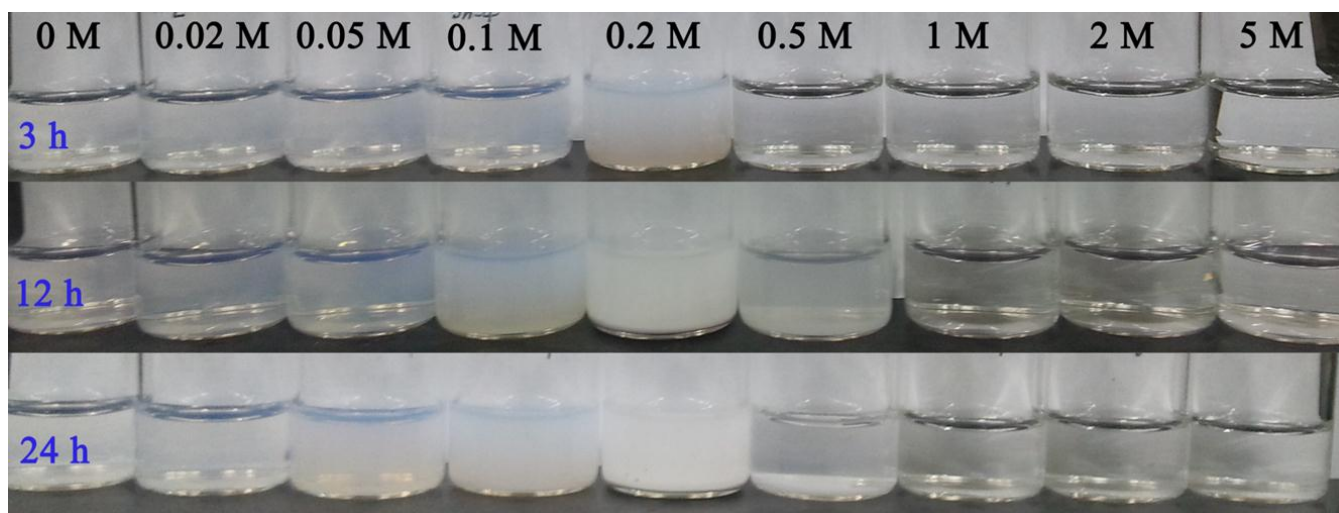

**Fig. S6.** Photographs of the TiCl<sub>4</sub> solution under various concentration of HNO<sub>3</sub> and reaction duration.

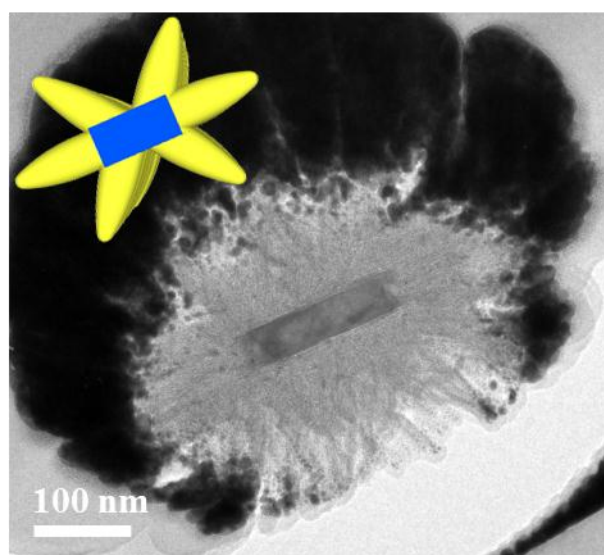

**Fig. S7.** A cross-sectional TEM image of a TiO<sub>2</sub>-SnO<sub>2</sub>.



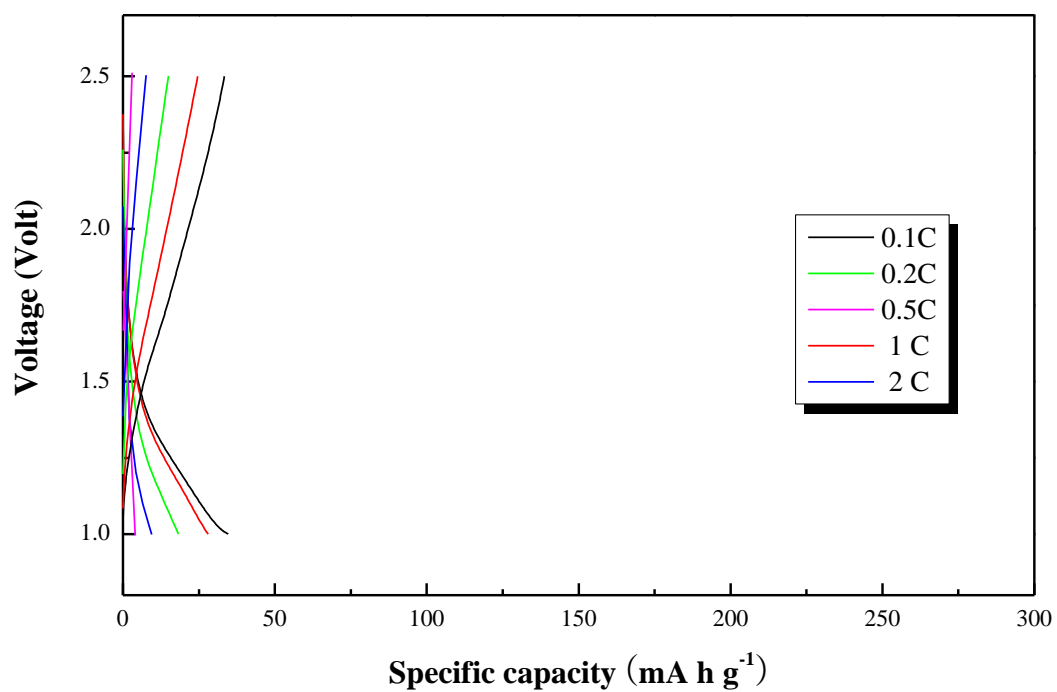

**Fig. S8.** Charging-discharging curves of the SnO<sub>2</sub> NBs electrode over 1.0 – 2.5 V.

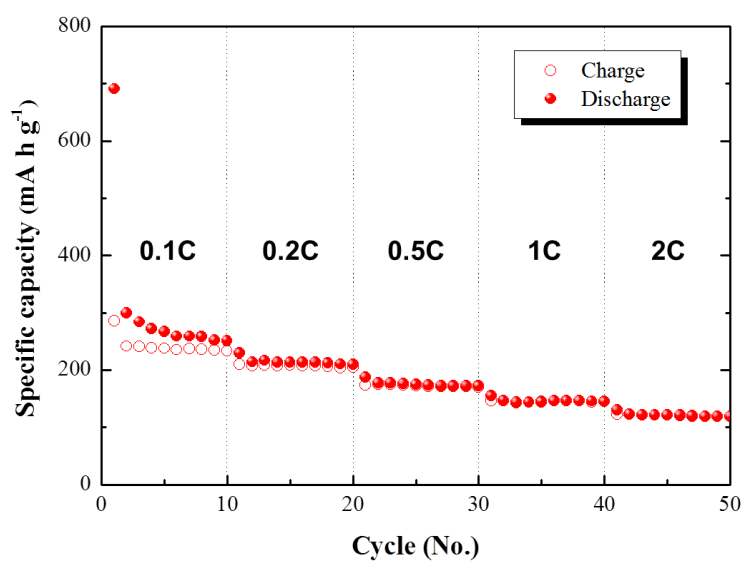

**Fig. S9.** Specific capacity versus cycle number of the TiO<sub>2</sub>-SnO<sub>2</sub> electrode cycled ten times at every C-rate (0.1 C, 0.2 C, 0.5 C, 1 C, and 2 C).

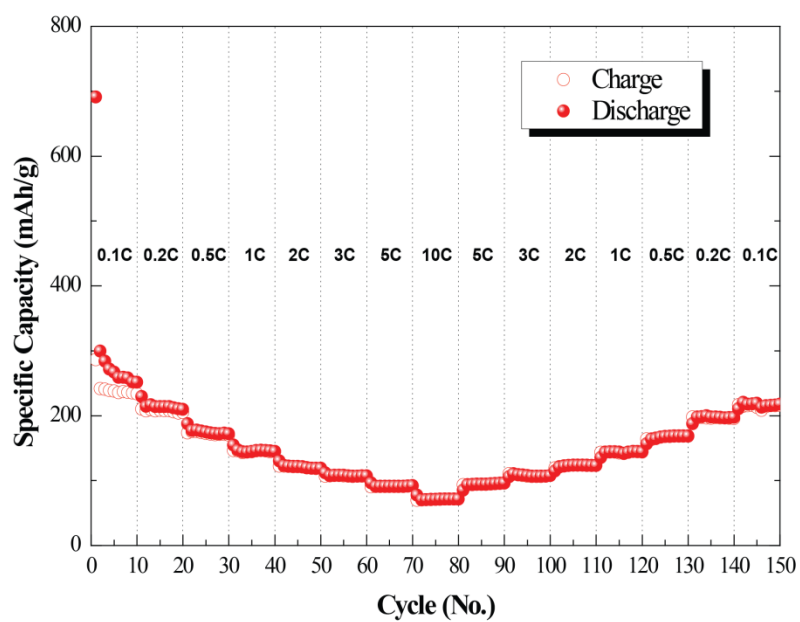

**Fig. S10.** Specific capacity versus cycle number of the TiO<sub>2</sub>-SnO<sub>2</sub> electrode cycled ten times at every C-rate (0.1 C, 0.2 C, 0.5 C, 1 C, 2 C, 3 C, 6 C, and 10 C) over 1.0–2.5 V.
